# Supplementary material for: Antibiotic prescriptions in acute otitis media and pharyngitis in Italian pediatric outpatients
Source: Ital J Pediatr. 2019 Aug 17;45:103. doi: 10.1186/s13052-019-0696-9 (PMC6697973; doi:10.1186/s13052-019-0696-9)
Supplement: Supplementary file 2 — Distribution of first line approach according to pharyngitis diagnosis. Pedianet, Italy, 2010–2015. (XLSX 9 kb) [file 13052_2019_696_MOESM2_ESM.xlsx]

## Sheet: Sheet1
	Additional file 2. Distribution of first line approach according to pharyngitis diagnosis. Pedianet, 2010-2015.
		Treated (N=79620)		Not treated (N=46478)
		N	(%)	N	(%)
	GABHS pharyngitis	34671	(43.5)	3258	(7.0)
	non-GABHS pharyngitis	16466	(20.7)	20559	(44.2)
	non-defined pharyngitis	28483	(35.8)	22661	(48.8)
